# Supplementary material for: Development of the Validated Stability-Indicating Method for the Determination of Vortioxetine in Bulk and Pharmaceutical Formulation by HPLC-DAD, Stress Degradation Kinetics Studies and Detection of Degradation Products by LC-ESI-QTOF-MS
Source: MDPI journal article supplement (doi:10.3390/molecules27061883), 2022-03-14
Supplement: s1 [file s1]

# Development of Validated Stability-Indicating Method for Determination of Vortioxetine in Bulk and Pharmaceutical Formulation by Hplc-Dad, Stress Degradation Kinetics Studies and Detection of Degradation Products by LC-ESI-QTOF-MS

Karol Wróblewski<sup>1,2,3\*</sup>, Małgorzata Szultka-Młyńska<sup>4</sup>, Daria Janiszewska<sup>4</sup>, Anna Petruczynik<sup>5</sup>, Bogusław Buszewski<sup>4,6</sup>

<sup>1</sup>Department of Experimental and Clinical Pharmacology, University of Rzeszów, Kopisto 2a, 35-959 Rzeszow, Poland; karolw222@wp.pl

<sup>2</sup>Laboratory for Innovative Research in Pharmacology, University of Rzeszów, Kopisto 2a, 35-959 Rzeszow, Poland

<sup>3</sup>Interdisciplinary Center for Preclinical and Clinical Research, University of Rzeszów, Werynia 2A, 36-100 Kolbuszowa, Poland

<sup>4</sup>Department of Environmental Chemistry and Bioanalytics, Nicolaus Copernicus University, Faculty of Chemistry Gagarina 7, 87-100 Torun, Poland; szultka.malgorzata@wp.pl, janiszewska\_daria@doktorant.umk.pl

<sup>5</sup>Department of Inorganic Chemistry, Medical University of Lublin, Chodźki 4a, 20-093 Lublin, Poland; annapetruczynik@poczta.onet.pl

<sup>6</sup>Centre for Modern Interdisciplinary Technologies, Nicolaus Copernicus University, Wileńska 4, 87-100 Torun, Poland; bbusz@chem.umk.pl

\* Correspondence: karolw222@wp.pl

## Supplementary Material

**Table S1.** Lazar toxicity predictions (<https://lazar.in-silico.ch/predict>).

**Figure S1.** Q-TOF MS/MS spectra of VOR and its degradation product DP1-DP7.

**Figure S2.** Fragmentation pattern of the [M+H]<sup>+</sup> ions of VOR and its degradation product DP1-DP7.

**Table S1.** Lazar toxicity predictions (<https://lazar.in-silico.ch/predict/>).

| <b>Compound</b><br><br><br><br><b>Copyright:</b> ©<br>2022 by the<br>authors.<br>Licensee MDPI,<br>Basel,<br>Switzerland.<br>This article is an<br>open access<br>article<br>distributed<br>under the terms<br>and conditions<br>of the Creative<br>Commons<br>Attribution (CC<br>BY) license<br>( <a href="https://creativecommons.org/licenses/by/4.0/">https://creativecommons.org/licenses/by/4.0/</a> ). |                                    |                                           |                                    |                                  |                                      |                                                      |
|------------------------------------------------------------------------------------------------------------------------------------------------------------------------------------------------------------------------------------------------------------------------------------------------------------------------------------------------------------------------------------------------------------------------------------------------------------------------------------------------|------------------------------------|-------------------------------------------|------------------------------------|----------------------------------|--------------------------------------|------------------------------------------------------|
|                                                                                                                                                                                                                                                                                                                                                                                                                                                                                                |                                    | <i>Acute toxicity<br/>(Daphnia magna)</i> | <i>Carcinogenicity<br/>(Mouse)</i> | <i>Carcinogenicity<br/>(Rat)</i> | <i>Carcinogenicity<br/>(Rodents)</i> | <i>Mutagenicity<br/>(Salmonella<br/>typhimurium)</i> |
|                                                                                                                                                                                                                                                                                                                                                                                                                                                                                                | <i>Type</i>                        | regression                                | classification                     | classification                   | classification                       | classification                                       |
|                                                                                                                                                                                                                                                                                                                                                                                                                                                                                                | <i>Prediction</i>                  | 14.8 mg/L                                 | non-carcinogenic                   | non-carcinogenic                 | non-carcinogenic                     | non-mutagenic                                        |
| DP1                                                                                                                                                                                                                                                                                                                                                                                                                                                                                            | <i>95% Prediction<br/>interval</i> | 1.56 -142 mg/L                            | NA                                 | NA                               | NA                                   | NA                                                   |

|            |                                |                     |                                                    |                                                   |                                                    |                                                                 |
|------------|--------------------------------|---------------------|----------------------------------------------------|---------------------------------------------------|----------------------------------------------------|-----------------------------------------------------------------|
|            | <i>Probability</i>             | NA                  | non-carcinogenic:<br>0.207<br>carcinogenic: 0.066  | carcinogenic: 0.13<br>non-carcinogenic:<br>0.143  | carcinogenic: 0.06<br>non-carcinogenic:<br>0.213   | mutagenic: 0.255<br>non-mutagenic:<br>0.29                      |
| <b>DP2</b> | <i>Type</i>                    | regression          | classification                                     | classification                                    | classification                                     | classification                                                  |
|            | <i>Prediction</i>              | 2.36 mg/L           | non-carcinogenic                                   | <b>carcinogenic</b>                               | non-carcinogenic                                   | mutagenic;<br>attention:<br>measured activity:<br>non-mutagenic |
|            | <i>95% Prediction interval</i> | 0.111 - 50.5 mg/L   | NA                                                 | NA                                                | NA                                                 | NA                                                              |
|            | <i>Probability</i>             | NA                  | non-carcinogenic:<br>0.244<br>carcinogenic: 0.0892 | carcinogenic: 0.193<br>non-carcinogenic:<br>0.141 | carcinogenic: 0.0989<br>non-carcinogenic:<br>0.136 | mutagenic: 0.254<br>non-mutagenic:<br>0.191                     |
| <b>DP3</b> | <i>Type</i>                    | regression          | classification                                     | classification                                    | classification                                     | classification                                                  |
|            | <i>Prediction</i>              | 17.5 mg/L           | non-carcinogenic                                   | <b>carcinogenic</b>                               | <b>carcinogenic</b>                                | <b>mutagenic</b>                                                |
|            | <i>95% Prediction interval</i> | 0.172 – 1780.0 mg/L | NA                                                 | NA                                                | NA                                                 | NA                                                              |
|            | <i>Probability</i>             | NA                  | non-carcinogenic:<br>0.153<br>carcinogenic: 0.141  | carcinogenic: 0.191<br>non-carcinogenic:<br>0.103 | carcinogenic: 0.246<br>non-carcinogenic:<br>0.0481 | mutagenic: 0.184<br>non-mutagenic:<br>0.15                      |
| <b>DP4</b> | <i>Type</i>                    | regression          | classification                                     | classification                                    | classification                                     | classification                                                  |
|            | <i>Prediction</i>              | 47.1 mg/L           | non-carcinogenic                                   | <b>carcinogenic</b>                               | <b>carcinogenic</b>                                | non-mutagenic                                                   |

|     |                         |                   |                                                                                                                          |                                                 |                                                                                                                          |                                           |
|-----|-------------------------|-------------------|--------------------------------------------------------------------------------------------------------------------------|-------------------------------------------------|--------------------------------------------------------------------------------------------------------------------------|-------------------------------------------|
|     | 95% Prediction interval | 3.12 – 713.0 mg/L | NA                                                                                                                       | NA                                              | NA                                                                                                                       | NA                                        |
|     | Probability             | NA                | non-carcinogenic: 0.263<br>carcinogenic: 0.0                                                                             | carcinogenic: 0.222<br>non-carcinogenic: 0.0415 | carcinogenic: 0.263<br>non-carcinogenic: 0.0                                                                             | mutagenic: 0.0709<br>non-mutagenic: 0.215 |
| DP5 | Type                    | regression        | classification                                                                                                           | classification                                  | classification                                                                                                           | classification                            |
|     | Prediction              | 17.3 mg/L         | non-carcinogenic                                                                                                         | carcinogenic                                    | carcinogenic                                                                                                             | mutagenic                                 |
|     | 95% Prediction interval | 0.24 -1240.0 mg/L | NA                                                                                                                       | NA                                              | NA                                                                                                                       | NA                                        |
|     | Probability             | NA                | non-carcinogenic: 0.17<br>carcinogenic: 0.124                                                                            | carcinogenic: 0.21<br>non-carcinogenic: 0.084   | carcinogenic: 0.253<br>non-carcinogenic: 0.0413                                                                          | mutagenic: 0.171<br>non-mutagenic: 0.162  |
| DP6 | Type                    | regression        | Warnings:<br>cannot create prediction: only one similar compound for threshold 0.2 in the training set (Threshold: 0.2). | classification                                  | Warnings:<br>cannot create prediction: only one similar compound for threshold 0.2 in the training set (Threshold: 0.2). | classification                            |
|     | Prediction              | 34.6 mg/L         |                                                                                                                          | non-carcinogenic                                |                                                                                                                          | non-mutagenic                             |
|     | 95% Prediction interval | 3.26 -367.0 mg/L  |                                                                                                                          | NA                                              |                                                                                                                          | NA                                        |
|     | Probability             | NA                |                                                                                                                          | carcinogenic: 0.0829<br>non-carcinogenic: 0.167 |                                                                                                                          | mutagenic: 0.132<br>non-mutagenic: 0.168  |

| DP7 | Type                    | regression                                                                                                                                                   | classification                                  | classification                                | classification                                 | classification                            |
|-----|-------------------------|--------------------------------------------------------------------------------------------------------------------------------------------------------------|-------------------------------------------------|-----------------------------------------------|------------------------------------------------|-------------------------------------------|
|     | Prediction              | 45.4 mg/L                                                                                                                                                    | non-carcinogenic                                | carcinogenic                                  | carcinogenic                                   | non-mutagenic                             |
|     | 95% Prediction interval | Warnings:<br><br>Insufficient number of neighbors (2) for regression model, using weighted average of similar substances (no prediction interval available). | NA                                              | NA                                            | NA                                             | NA                                        |
|     | Probability             | NA                                                                                                                                                           | non-carcinogenic: 0.217<br>carcinogenic: 0.0611 | carcinogenic: 0.167<br>non-carcinogenic: 0.11 | carcinogenic: 0.151<br>non-carcinogenic: 0.127 | mutagenic: 0.0628<br>non-mutagenic: 0.253 |

NA-not applicable

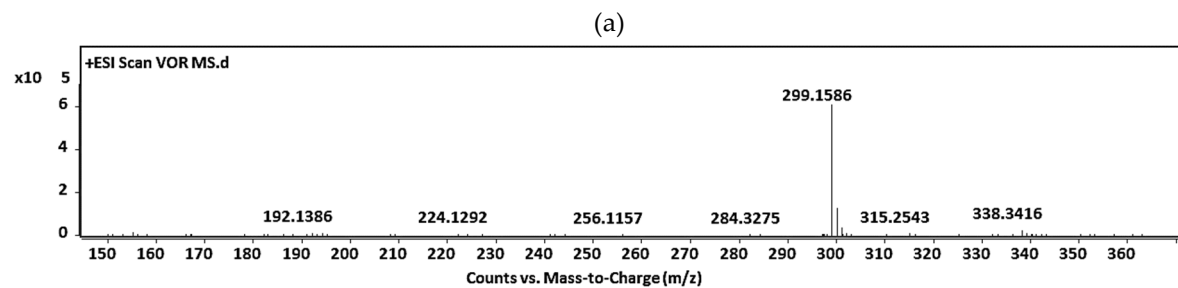

(b)

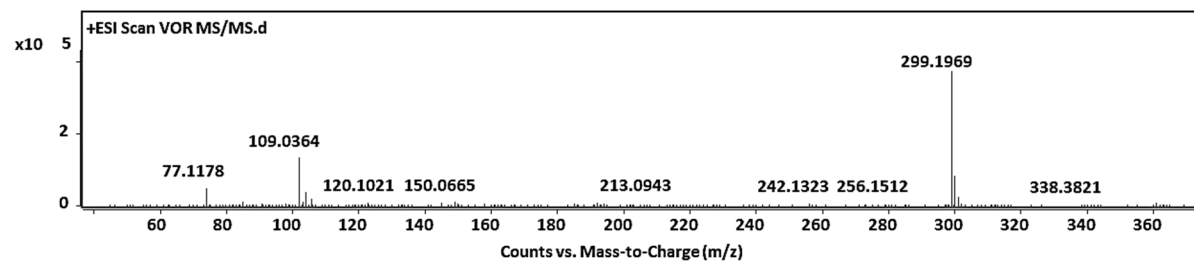

(c)

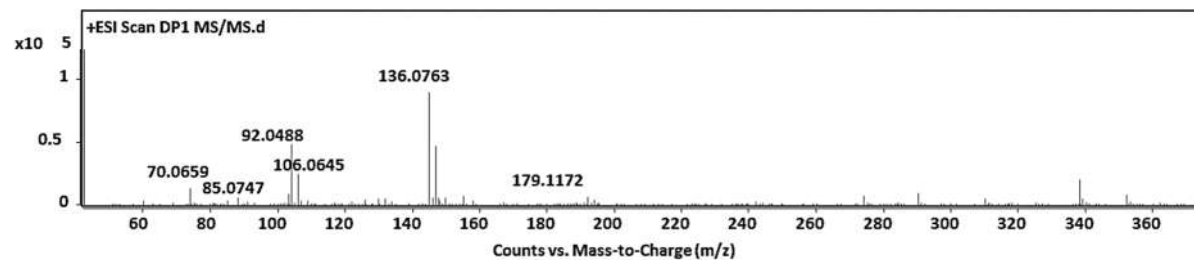

(d)

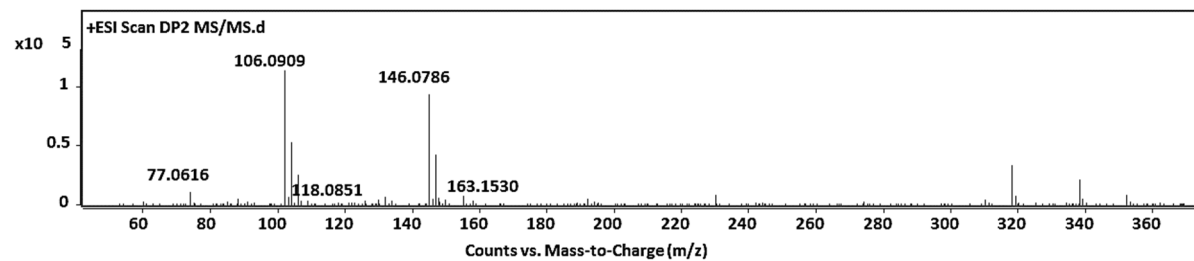

(e)

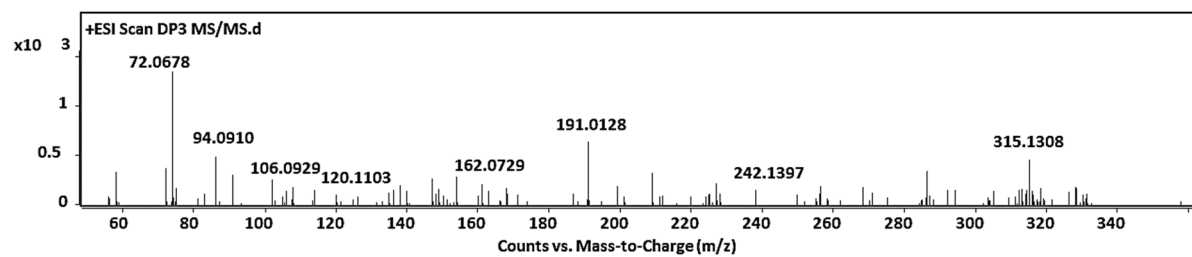

(f)

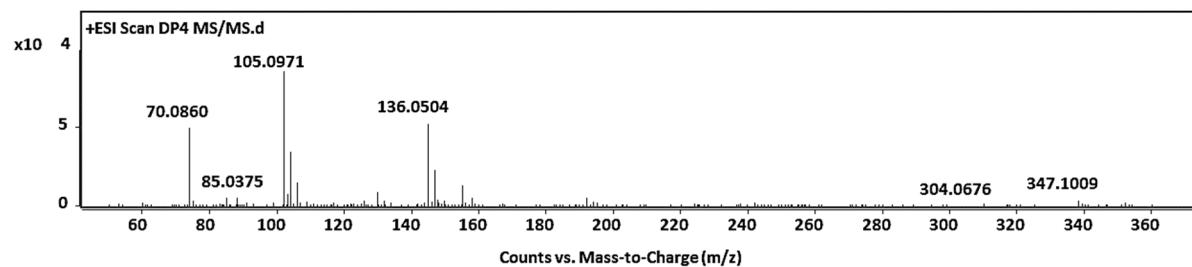

(g)

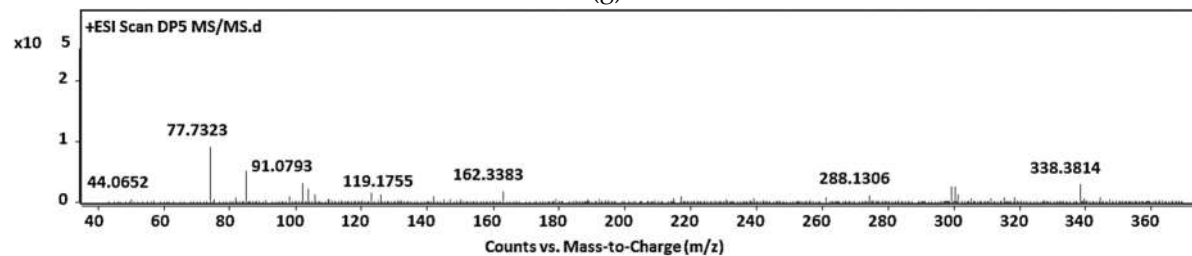

(h)

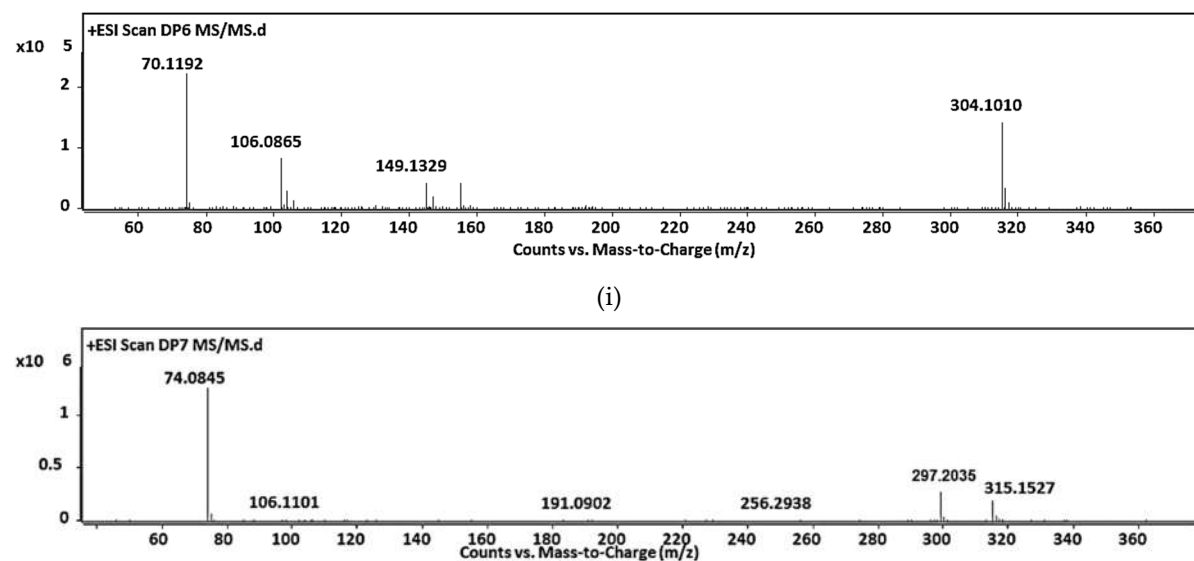

**Figure S1.** Q-TOF MS/MS spectra of VOR and its degradation product DP1-DP7.



(a)

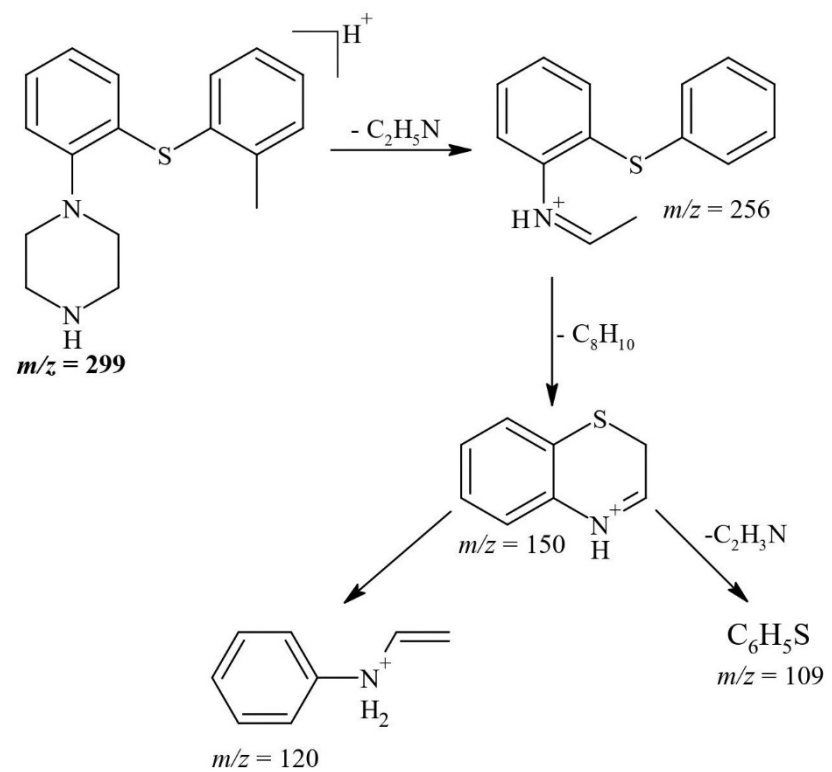



(c)

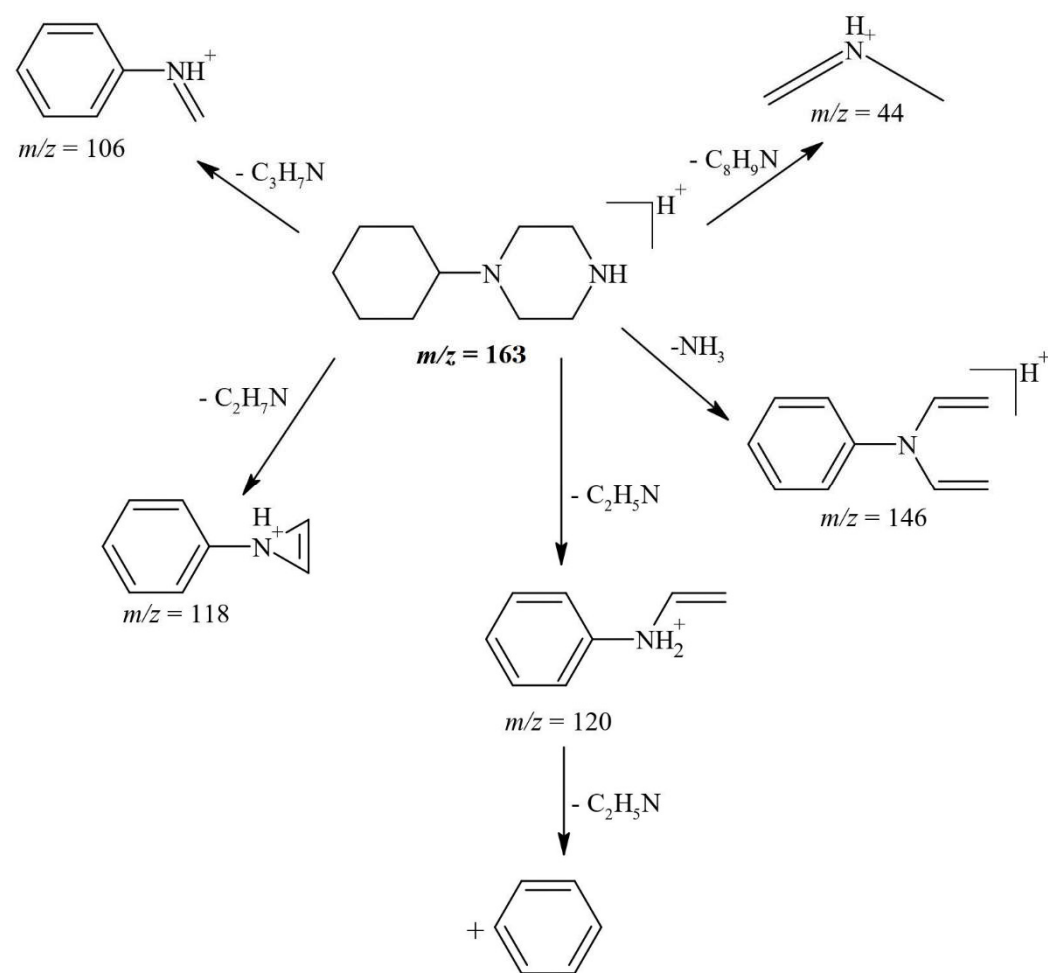

(d)

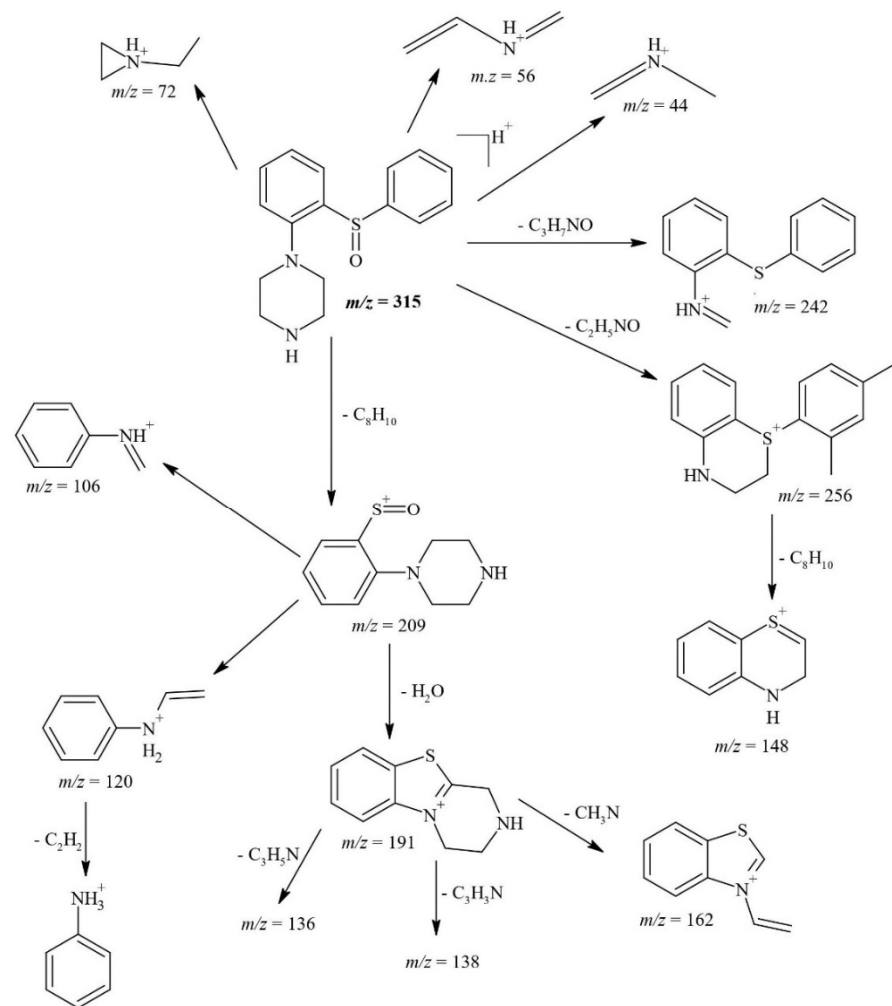

(e)

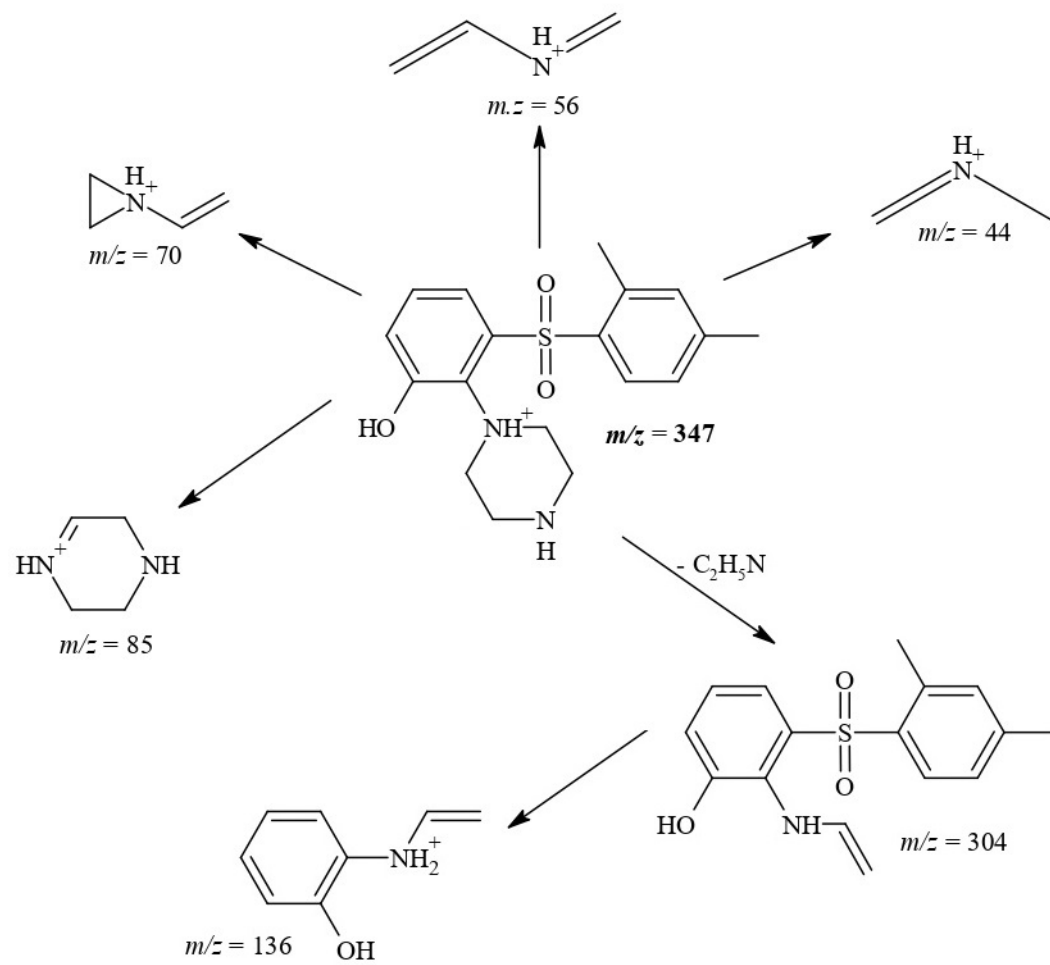

(f)

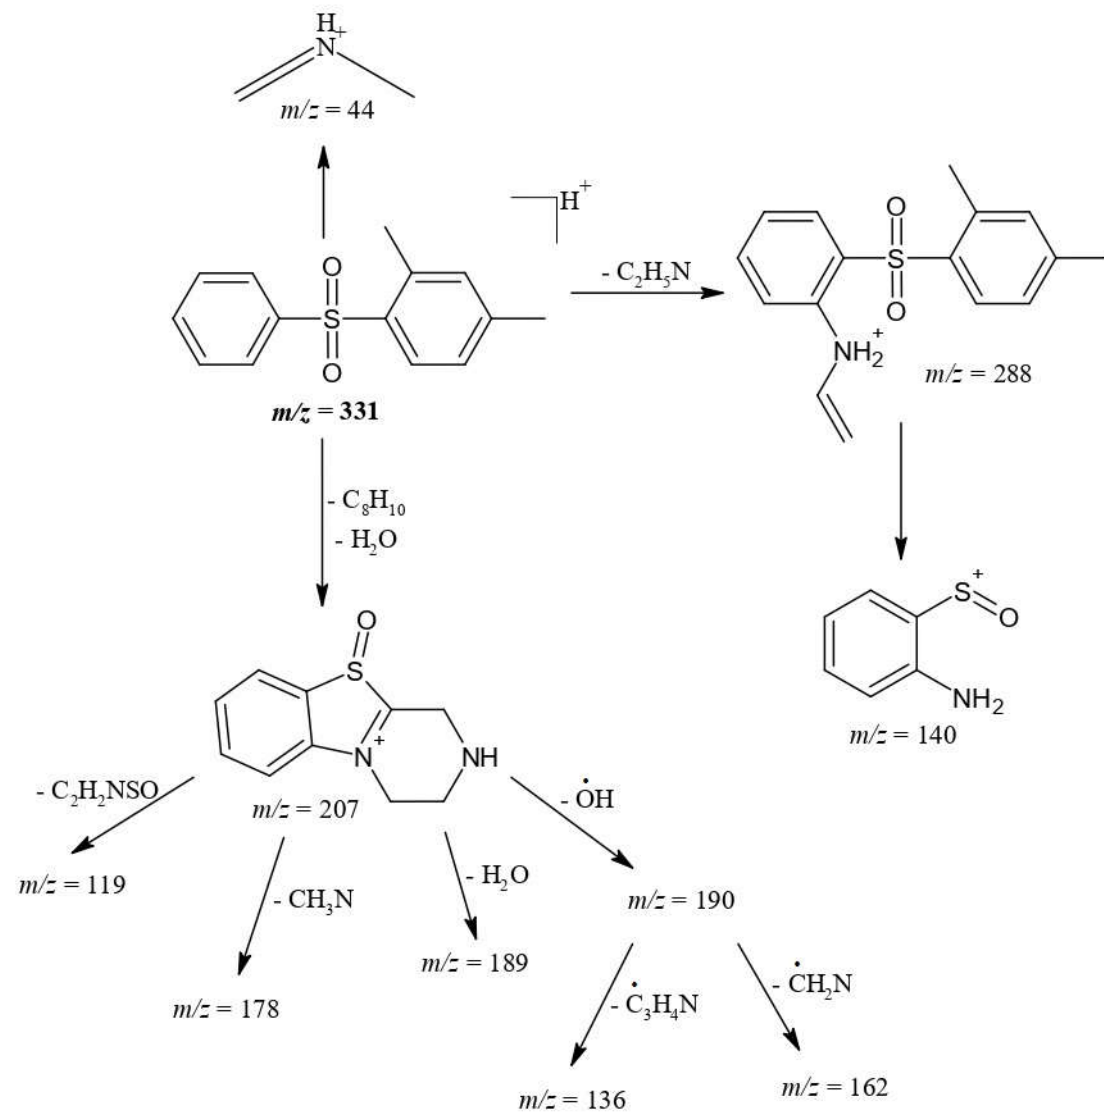

(g)

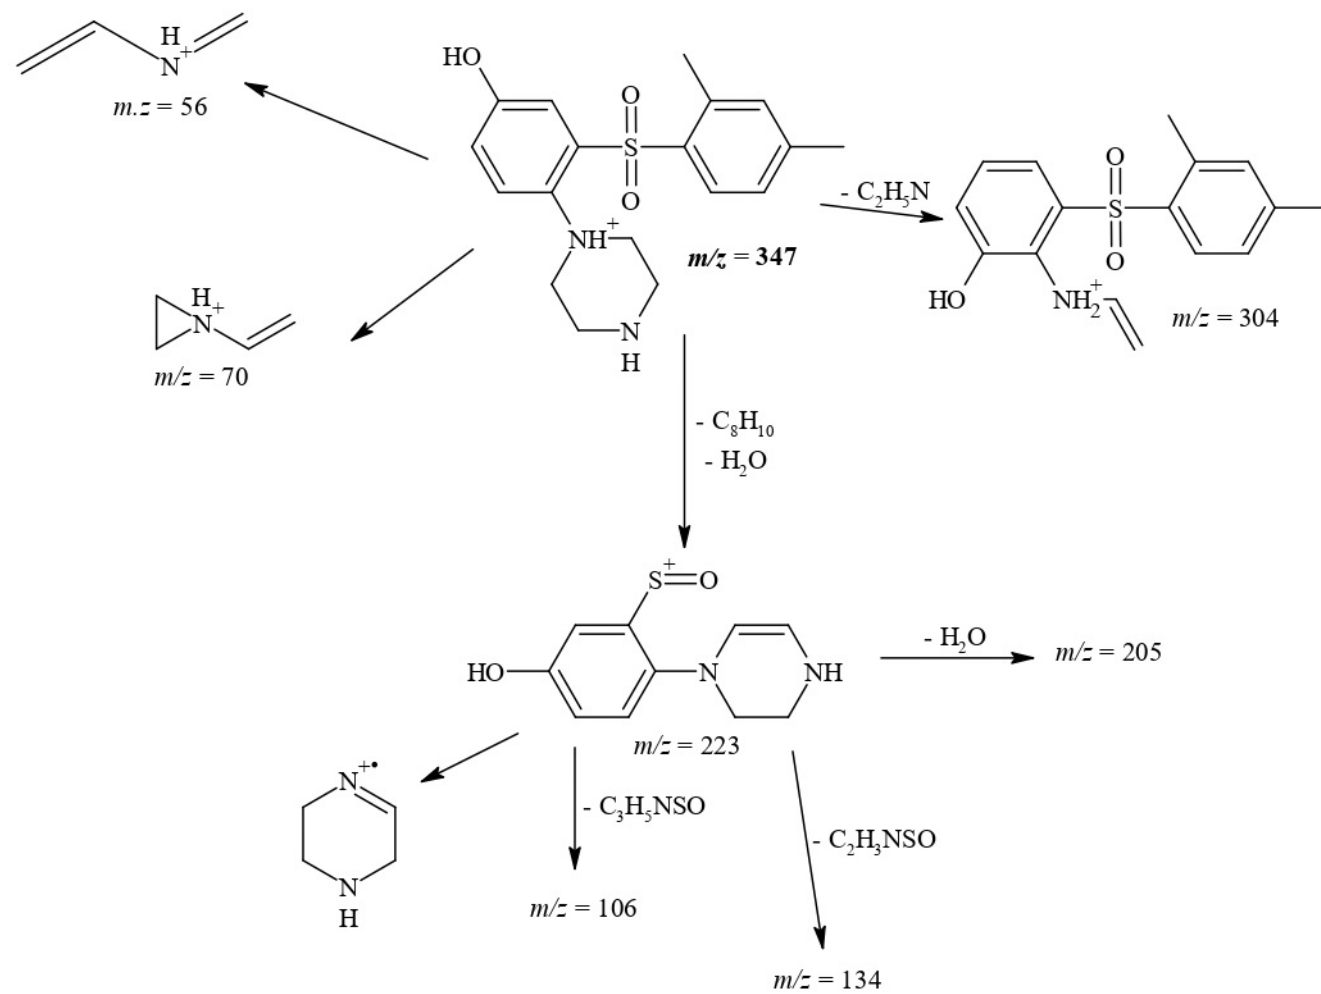

(h)

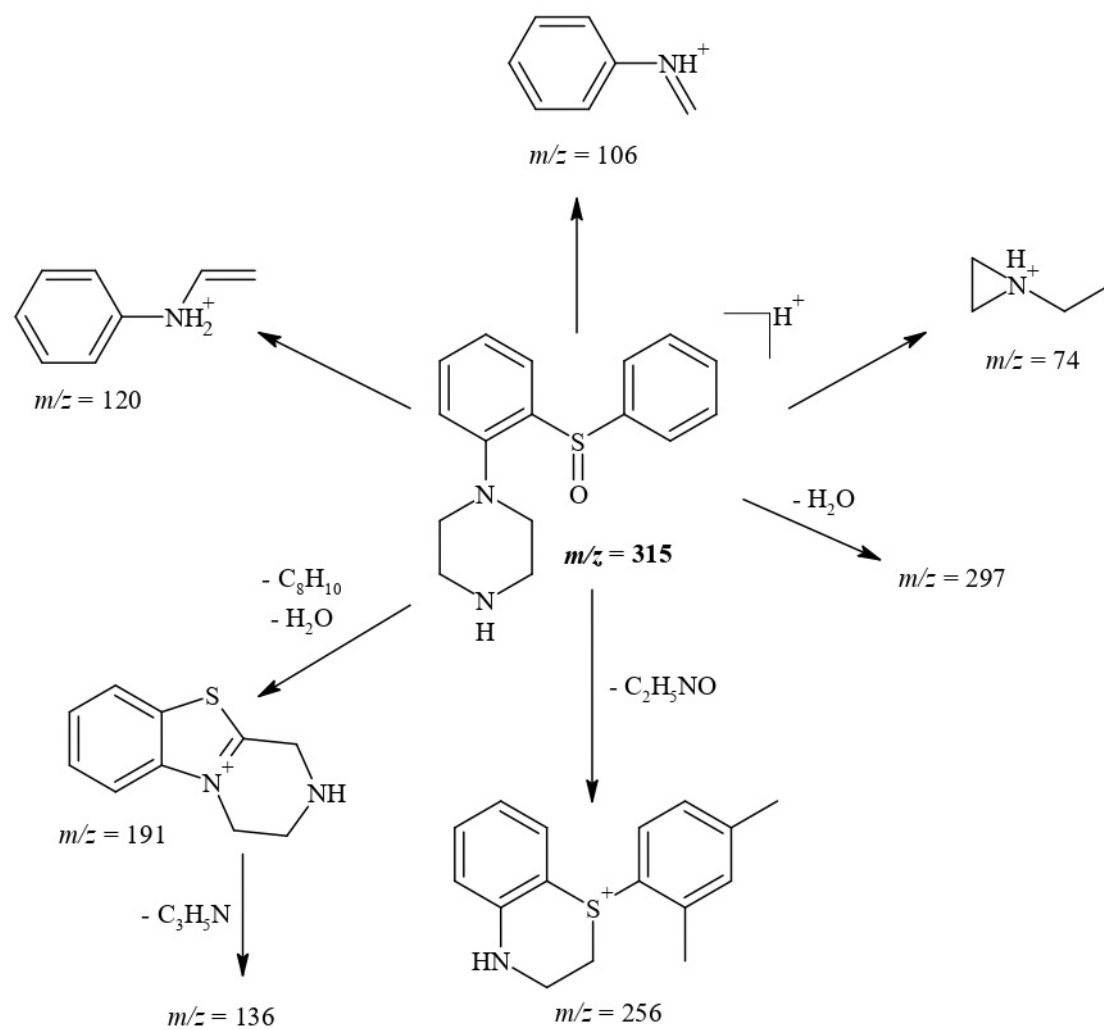

**Figure S2.** Fragmentation pattern of the [M+H]<sup>+</sup> ions of VOR and its degradation product DP1-DP7.
